# Supplementary figures and images for: Rapid and sensitive point-of-care diagnosis of human cytomegalovirus infection using RPA-CRISPR technology
Source: PubMed Central journal article supplement — Heliyon. 2024 Mar 27;10(7):e28726. doi: 10.1016/j.heliyon.2024.e28726 (PMC10998215; doi:10.1016/j.heliyon.2024.e28726), 2024-03-27

Fig. 2C

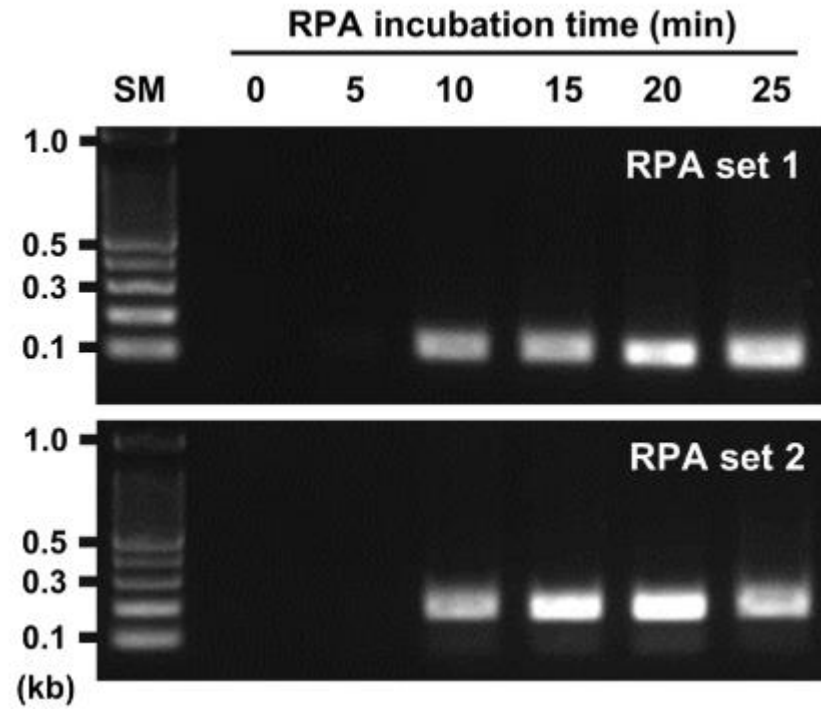

Fig. 2C uncropped image

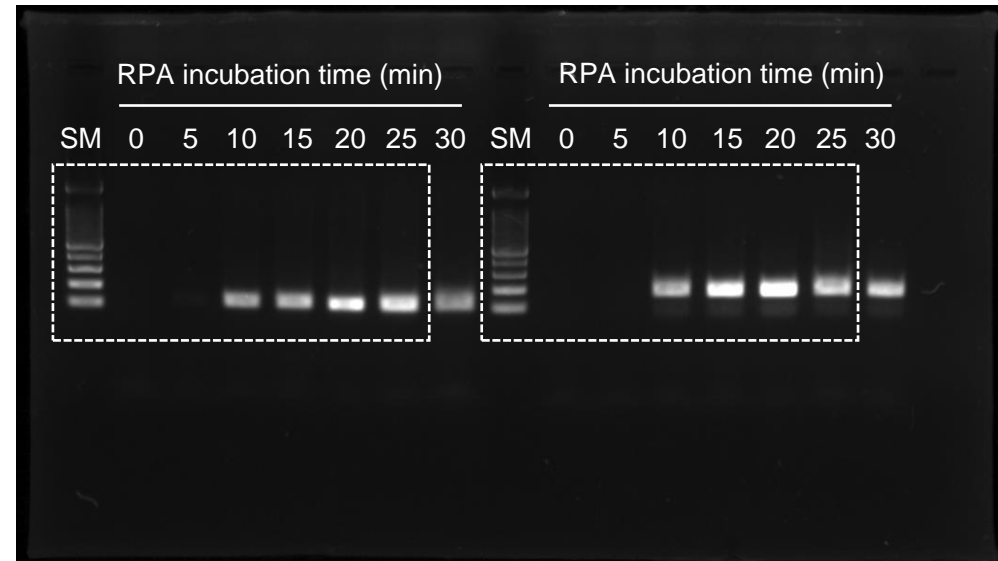

Supplement: mmc1.pdf [file mmc1.pdf]
